# Supplementary material
Source: publisher figshare collection journal article supplement (https://acs.figshare.com/ndownloader/files/10579150)
Supplement: Supplementary file 1 [file 10579150]

## **Supporting Information**

### **Fe-Ce mixed oxides supported on carbon nanotubes for simultaneous removal of NO and Hg<sup>0</sup> in flue gas**

**Yaguang Ma, Dingyuan Zhang, Huamin Sun, Jiafeng Wu, Peng Liang, Huawei Zhang\***

**College of Chemical and Environmental Engineering, Shandong University of Science and  
Technology, Qingdao 266590 PR China**

**Correspondence information: Huawei Zhang**

**Qingdao 266590, China. E-mail: [skkdzhw@163.com](mailto:skkdzhw@163.com), tel:+86 13806399945**

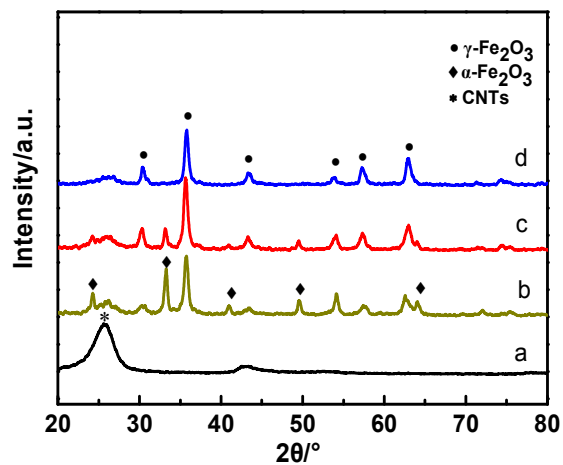

**Figure S1.** XRD spectra of different catalysts: (a) MWCNTs, (b) 300 °C treatment temperature of the  $\text{Fe}_{(10)}\text{O}_x/\text{MWCNTs}$  catalyst, (c) 350 °C treatment temperature of the  $\text{Fe}_{(10)}\text{O}_x/\text{MWCNTs}$  catalyst, (d) 400 °C treatment temperature of the  $\text{Fe}_{(10)}\text{O}_x/\text{MWCNTs}$  catalyst.

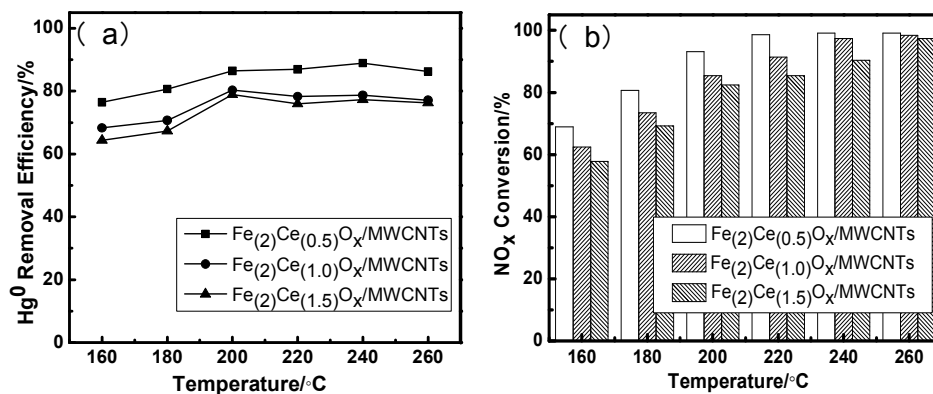

**Figure S2.** Effect of different amounts of Ce doping catalysts on simultaneous removal of NO and Hg<sup>0</sup>: (a) Hg<sup>0</sup> removal efficiency; (b) NO<sub>x</sub> conversion.

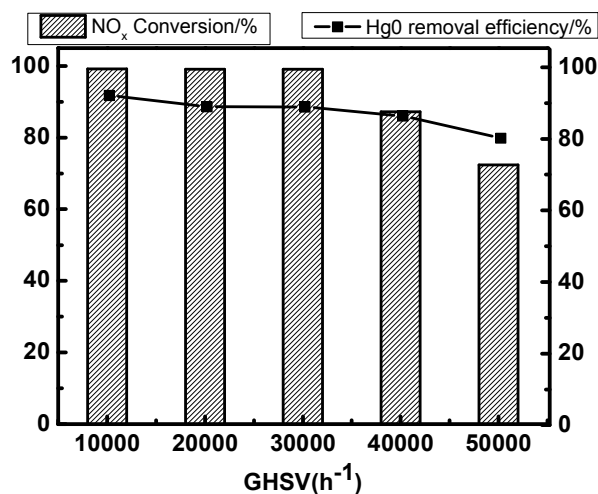

**Figure S3.** The effect of different space velocities for Simultaneous Removal of NO and Hg<sup>0</sup> by Fe<sub>2</sub>Ce<sub>0.5</sub>O<sub>x</sub>/MWCNTs catalyst at 240 °C.

## ACKNOWLEDGMENTS

This work was supported by the National Natural Science Foundation of China (Grant 51406107), the Key Research and Development Program of Shandong Province (Grant 2017GSF17101).
